# Supplementary material
Source: PubMed Central journal article supplement (PMC3134167)
Supplement: NIHMS298864-supplement-Supp_Fig_S1-3___TableS1.pdf [file NIHMS298864-supplement-Supp_Fig_S1-3___TableS1.pdf]

Damron *et al.* Vanadate and triclosan synergistically induce alginate production by *Pseudomonas aeruginosa* strain PAO1

**Supplemental Table 1.** Bacterial strains, plasmids, oligonucleotides used in this study

| Bacterial strains          | Phenotype, genotype, description, or sequence <sup>a</sup>                  | Source and or reference <sup>b</sup>                |
|----------------------------|-----------------------------------------------------------------------------|-----------------------------------------------------|
| <i>P. aeruginosa</i>       |                                                                             |                                                     |
| PAO1                       | Alg <sup>-</sup> Prototroph                                                 | P. Phibbs, East Carolina University, Greenville, NC |
| PAO1Δ <i>algB</i>          | Alg <sup>-</sup> , PAO1 in-frame deletion of <i>algB</i> (PA5483)           | (Damron <i>et al.</i> , 2009)                       |
| PAO1 <i>algD</i>           | Alg <sup>-</sup> , PAO1 Tc <sup>r</sup> insertion into <i>algD</i> (PA3540) | (Jacobs <i>et al.</i> , 2003)                       |
| PAO1 <i>algE</i>           | Alg <sup>-</sup> , PAO1 Tc <sup>r</sup> insertion into <i>algE</i> (PA3544) | (Jacobs <i>et al.</i> , 2003)                       |
| PAO1Δ <i>algR</i> (PSL317) | Alg <sup>-</sup> , PAO1 in-frame deletion of <i>algR</i> (PA5261)           | (Lizewski <i>et al.</i> , 2004)                     |
| PAO1Δ <i>algW</i>          | Alg <sup>-</sup> , PAO1 in-frame deletion of <i>algW</i> (PA4446)           | (Damron & Yu)                                       |
| PAO1Δ <i>algU</i>          | Alg <sup>-</sup> , PAO1 in-frame deletion of <i>algU</i> (PA0762)           | (Damron <i>et al.</i> , 2009)                       |
| PAO1 <i>algZ</i> (PAO6886) | Alg <sup>-</sup> , PAO1 Tc <sup>r</sup> insertion into <i>algZ</i> (PA5262) | (Yu <i>et al.</i> , 1997)                           |
| PAO1 <i>kinB</i>           | Alg <sup>+</sup> , PAO1 Gm <sup>r</sup> insertion into <i>kinB</i> (PA5484) | (Damron <i>et al.</i> , 2009)                       |
| PAO1 <i>mucB</i>           | Alg <sup>+</sup> , PAO1 Gm <sup>r</sup> insertion into <i>mucB</i> (PA0764) | H. Yu, Marshall University                          |

School of Medicine,  
Huntington, WV

|                            |                                                                             |                                                                 |
|----------------------------|-----------------------------------------------------------------------------|-----------------------------------------------------------------|
| PAO1 <i>mucC</i>           | Alg <sup>-</sup> , PAO1 Gm <sup>r</sup> insertion into <i>mucC</i> (PA0765) | (Boucher <i>et al.</i> , 1997)                                  |
| PAO1 <i>mucD</i>           | Alg <sup>+</sup> , PAO1 Gm <sup>r</sup> insertion into <i>mucD</i> (PA0766) | (Qiu <i>et al.</i> , 2007)                                      |
| PAO1 <i>mucE</i>           | Alg <sup>-</sup> , PAO1 Tc <sup>r</sup> insertion into <i>mucE</i> (PA4033) | (Jacobs <i>et al.</i> , 2003)                                   |
| PAO1 <i>mucP</i>           | Alg <sup>-</sup> , PAO1 Tc <sup>r</sup> insertion into <i>mucP</i> (PA3649) | (Qiu <i>et al.</i> , 2007)                                      |
| PAO1 <i>oprH</i>           | Alg <sup>-</sup> , PAO1 Tc <sup>r</sup> insertion into <i>oprH</i> (PA1178) | (Jacobs <i>et al.</i> , 2003)                                   |
| PAO1Δ <i>phoP</i>          | Alg <sup>-</sup> , PAO1 in-frame deletion of <i>phoP</i> (PA1179)           | R. Ernst, University of<br>Maryland-Baltimore,<br>Baltimore, MA |
| PAO1 <i>pmrA</i>           | Alg <sup>-</sup> , PAO1 Tc <sup>r</sup> insertion into <i>pmrA</i> (PA4776) | (Jacobs <i>et al.</i> , 2003)                                   |
| PAO1 <i>pmrB</i>           | Alg <sup>-</sup> , PAO1 Tc <sup>r</sup> insertion into <i>pmrB</i> (PA4777) | (Jacobs <i>et al.</i> , 2003)                                   |
| PAO1 <i>prc</i> (PAO1-184) | Alg <sup>-</sup> , PAO1 Tc <sup>r</sup> insertion into <i>prc</i> (PA3649)  | (Reiling <i>et al.</i> , 2005)                                  |
| PAO1 <i>rpoH</i>           | Alg <sup>-</sup> , PAO1 Tc <sup>r</sup> insertion into <i>rpoH</i> (PA0376) | (Jacobs <i>et al.</i> , 2003)                                   |
| PAO1 <i>rpoS</i>           | Alg <sup>-</sup> , PAO1 Tc <sup>r</sup> insertion into <i>rpoS</i> (PA3622) | (Jacobs <i>et al.</i> , 2003)                                   |

|                           |                                                                                               |                                                          |
|---------------------------|-----------------------------------------------------------------------------------------------|----------------------------------------------------------|
| PAO1 $\Delta$ <i>rpoN</i> | Alg <sup>-</sup> , PAO1 in-frame deletion of <i>rpoN</i> (PA4462)                             | (Damron et al., 2009)                                    |
| PA14                      | Alg <sup>-</sup> <i>algU</i> <sup>+</sup> <i>mucA</i> <sup>+</sup>                            | F. Ausubel, Harvard Medical School, Boston, MA           |
| PAK                       | Alg <sup>-</sup> <i>algU</i> <sup>+</sup> <i>mucA</i> <sup>+</sup>                            | J. Goldberg, University of Virginia, Charlottesville, VA |
| PA103                     | Alg <sup>-</sup>                                                                              | J. Goldberg, University of Virginia, Charlottesville, VA |
| C0132                     | Alg <sup>-</sup> CF isolate, 1st colonizer, <i>algU</i> <sup>+</sup> <i>mucA</i> <sup>+</sup> | (Qiu et al., 2007)                                       |
| C3715                     | Alg <sup>-</sup> CF isolate, 1st colonizer, <i>algU</i> <sup>+</sup> <i>mucA</i> <sup>+</sup> | (Qiu et al., 2007)                                       |
| C7406                     | Alg <sup>-</sup> CF isolate, 1st colonizer, <i>algU</i> <sup>+</sup> <i>mucA</i> <sup>+</sup> | (Qiu et al., 2007)                                       |
| FRD1                      | Alg <sup>+</sup> CF isolate, <i>algT</i> <sup>+</sup> <i>mucA22</i>                           | (Ohman & Chakrabarty, 1981)                              |
| FRD2                      | Alg <sup>-</sup> CF isolate, <i>algT18</i> <i>mucA22</i>                                      | (DeVries & Ohman, 1994, Ohman & Chakrabarty, 1981)       |
| CF149                     | Alg <sup>-</sup> CF isolate, <i>algU</i> <sub>C182T</sub> <i>mucA</i> <sub>374□G</sub>        | (Damron et al., 2009)                                    |

|                                    |                                                                                                                                                                                                                                                                |                               |
|------------------------------------|----------------------------------------------------------------------------------------------------------------------------------------------------------------------------------------------------------------------------------------------------------------|-------------------------------|
| PAO581                             | Alg <sup>+</sup> , PAO1 <i>algU</i> <sup>+</sup> <i>mucA25</i>                                                                                                                                                                                                 | (Qiu <i>et al.</i> , 2008)    |
| <i>E. coli</i>                     |                                                                                                                                                                                                                                                                |                               |
| DH5α                               | F <sup>-</sup> , φ80 <i>lacZ</i> ΔM15, Δ( <i>lacZYA-argF</i> )U169, <i>deoR</i> , <i>recA1</i> , <i>endA1</i> , <i>hsdR17</i> (rk <sup>-</sup> , mk <sup>+</sup> ), <i>phoA</i> , <i>supE44</i> , λ <sup>-</sup> , <i>thi-1</i> , <i>gyrA96</i> , <i>relA1</i> | Lab strain                    |
| TOP10                              | DH5α derivative                                                                                                                                                                                                                                                | Invitrogen                    |
| <i>Plasmids</i>                    |                                                                                                                                                                                                                                                                |                               |
| pRK2013                            | Km <sup>r</sup> <i>Tra Mob ColE1</i>                                                                                                                                                                                                                           | (Figurski & Helinski, 1979)   |
| miniCTX1                           | Gene delivery vector for inserting genes at the CTX phage <i>att</i> site on the <i>P. aeruginosa</i> chromosome; Tc <sup>r</sup>                                                                                                                              | (Hoang <i>et al.</i> , 2000)  |
| miniCTX- <i>lacZ</i>               | MiniCTX1 carrying the complete <i>lacZ</i> ; Tc <sup>r</sup>                                                                                                                                                                                                   | (Hoang <i>et al.</i> , 2000)  |
| miniCTX- <i>PalgU-lacZ</i>         | Complete <i>PalgU</i> promoter (541 bp upstream of ATG <i>EcoRI/HindIII</i> fused with <i>lacZ</i> for integration at the CTX phage <i>att</i> site in <i>P. aeruginosa</i>                                                                                    | (Damron <i>et al.</i> , 2009) |
| miniCTX- <i>PalgD-lacZ</i>         | Complete <i>PalgD</i> promoter (1,525 bp upstream of ATG) <i>HindIII/BamH1</i> fused with <i>lacZ</i> for integration at the CTX phage <i>att</i> site in <i>P. aeruginosa</i>                                                                                 | (Damron <i>et al.</i> , 2009) |
| miniCTX- <i>PalgU-algU-HA-mucA</i> | <i>PalgU-algU-HA-mucA</i> generated by SOE-PCR <i>EcoRI/HindIII</i> in miniCTX1 for integration at the CTX phage <i>att</i> site in <i>P. aeruginosa</i>                                                                                                       | This study                    |

### *Oligonucleotides*

|                |                                                                           |            |
|----------------|---------------------------------------------------------------------------|------------|
| EcoR1-PalgU-F  | GTGAATTCGGGCACCCCCTGTTCGATCA                                              | This study |
| co-HAmucA-F    | 5'GCCAAGAGAGGTATCGCTATGTACCCATACGATGTTCCAGA<br>TTACGCTAGTCGTGAAGCCCTGCA3' | This study |
| co-HAmucA-R    | 5'TGCAGGGCTTCACGACTAGCGTAATCTGGAACATCGTATGGGTA<br>CATAGCGATACCTCTCTTGGC3' | This study |
| HindIII-mucA-R | 5'TTAAGCTTTCAGCGGTTTTCCAGGCTG3'                                           | This study |

---

<sup>a</sup> Alg<sup>-</sup>, non-mucoid phenotype and Alg<sup>+</sup>, mucoid phenotype

<sup>b</sup> See references listed below.

### REFERENCES FOR SUPPLEMENTAL TABLE 1

- Boucher, J. C., M. J. Schurr, H. Yu, D. W. Rowen & V. Deretic, (1997) *Pseudomonas aeruginosa* in cystic fibrosis: role of *mucC* in the regulation of alginate production and stress sensitivity. *Microbiology* **143** ( Pt 11): 3473-3480.
- Damron, F. H., D. Qiu & H. D. Yu, (2009) The *Pseudomonas aeruginosa* sensor kinase KinB negatively controls alginate production through AlgW-dependent MucA proteolysis. *J Bacteriol* **191**: 2285-2295.
- Damron, F. H. & H. D. Yu, (2011) *Pseudomonas aeruginosa* MucD regulates alginate pathway through activation of MucA degradation via MucP proteolytic activity. *J Bacteriol* **193**: 286-291.

- DeVries, C. A. & D. E. Ohman, (1994) Mucooid-to-nonmucooid conversion in alginate-producing *Pseudomonas aeruginosa* often results from spontaneous mutations in *algT*, encoding a putative alternate sigma factor, and shows evidence for autoregulation. *J Bacteriol* **176**: 6677-6687.
- Figuerski, D. H. & D. R. Helinski, (1979) Replication of an origin-containing derivative of plasmid RK2 dependent on a plasmid function provided *in trans*. *Proc Natl Acad Sci U S A* **76**: 1648-1652.
- Hoang, T. T., A. J. Kutchma, A. Becher & H. P. Schweizer, (2000) Integration-proficient plasmids for *Pseudomonas aeruginosa*: site-specific integration and use for engineering of reporter and expression strains. *Plasmid* **43**: 59-72.
- Jacobs, M. A., A. Alwood, I. Thaipisuttikul, D. Spencer, E. Haugen, S. Ernst, O. Will, R. Kaul, C. Raymond, R. Levy, L. Chun-Rong, D. Guenther, D. Bovee, M. V. Olson & C. Manoil, (2003) Comprehensive transposon mutant library of *Pseudomonas aeruginosa*. *Proc Natl Acad Sci U S A* **100**: 14339-14344.
- Lizewski, S. E., J. R. Schurr, D. W. Jackson, A. Frisk, A. J. Carterson & M. J. Schurr, (2004) Identification of AlgR-regulated genes in *Pseudomonas aeruginosa* by use of microarray analysis. *J Bacteriol* **186**: 5672-5684.
- Ohman, D. E. & A. M. Chakrabarty, (1981) Genetic mapping of chromosomal determinants for the production of the exopolysaccharide alginate in a *Pseudomonas aeruginosa* cystic fibrosis isolate. *Infect Immun* **33**: 142-148.
- Qiu, D., V. M. Eisinger, N. E. Head, G. B. Pier & H. D. Yu, (2008) ClpXP proteases positively regulate alginate overexpression and mucooid conversion in *Pseudomonas aeruginosa*. *Microbiology* **154**: 2119-2130.
- Qiu, D., V. M. Eisinger, D. W. Rowen & H. D. Yu, (2007) Regulated proteolysis controls mucooid conversion in *Pseudomonas aeruginosa*. *Proc Natl Acad Sci U S A* **104**: 8107-8112.
- Reiling, S. A., J. A. Jansen, B. J. Henley, S. Singh, C. Chattin, M. Chandler & D. W. Rowen, (2005) Prc protease promotes mucooidy in *mucA* mutants of *Pseudomonas aeruginosa*. *Microbiology* **151**: 2251-2261.
- Yu, H., M. Mudd, J. C. Boucher, M. J. Schurr & V. Deretic, (1997) Identification of the *algZ* gene upstream of the response regulator *algR* and its participation in control of alginate production in *Pseudomonas aeruginosa*. *J Bacteriol* **179**: 187-193.

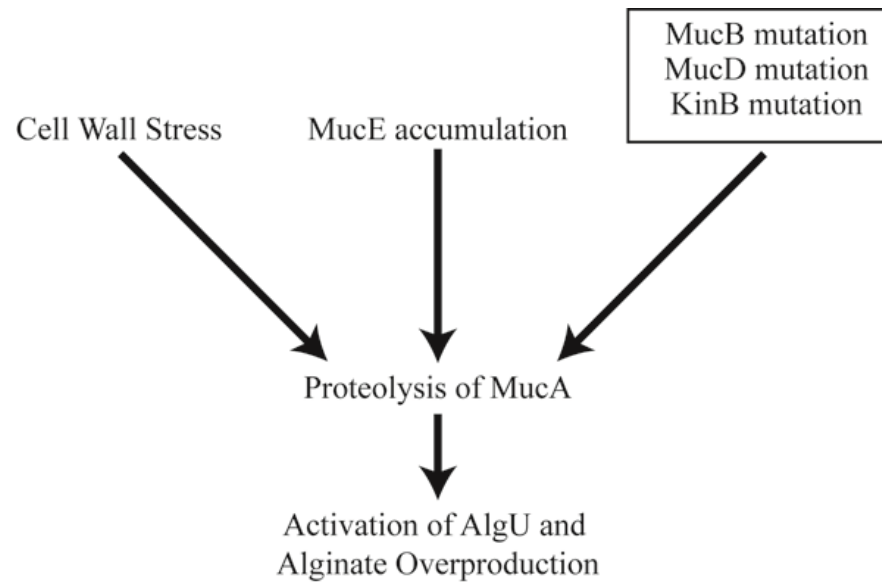

**Figure S1. Signal transduction activates proteolytic degradation of MucA and alginate overproduction in *P. aeruginosa*.** The degradation of wild type MucA is controlled by several proteases including envelope proteases AlgW and MucP. AlgW can be activated by cell wall stress (Wood *et al.*, 2006, Wood & Ohman, 2009), or when envelope protein MucE is overexpressed (Qiu *et al.*, 2007). *mucB*, *mucD*, and *kinB* mutant strains also are mucoid due to the proteolytic degradation of MucA (see *Introduction*).

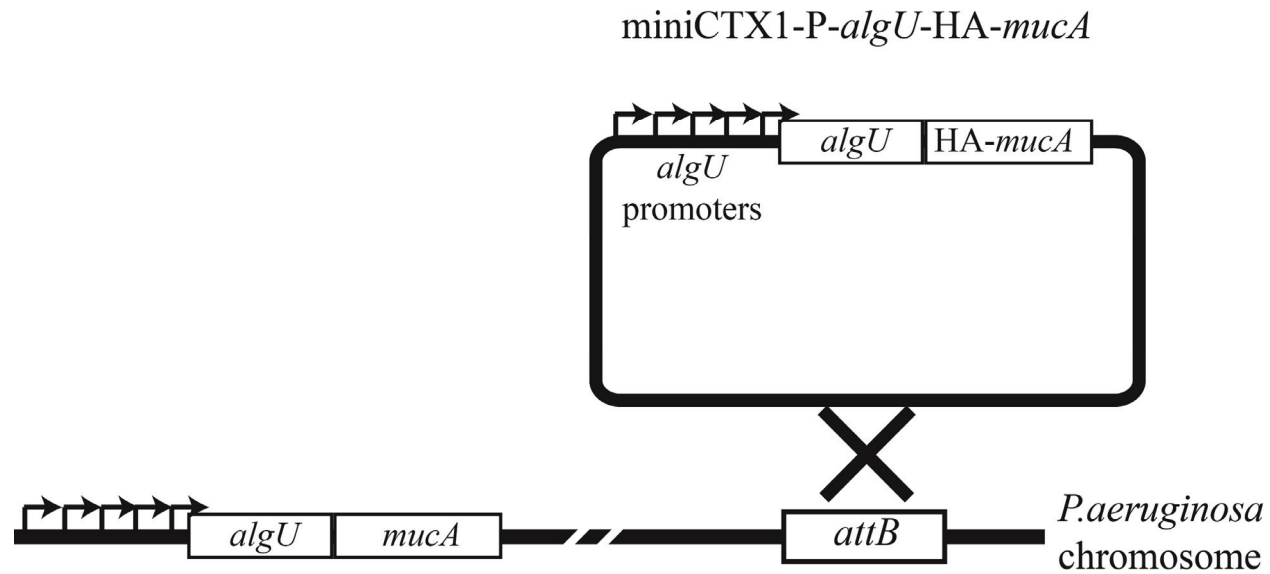

**Figure S2.** A schematic of miniCTX1-P-*algU*-HA-*mucA*. The single copy HA-*mucA* expressing construct was assembled with N-terminal HA-epitope tagged MucA that is expressed from the *PalgU* promoters. The construct is integrated into the *attB* site of the *P. aeruginosa* chromosome. Specific cloning techniques are discussed in the text.



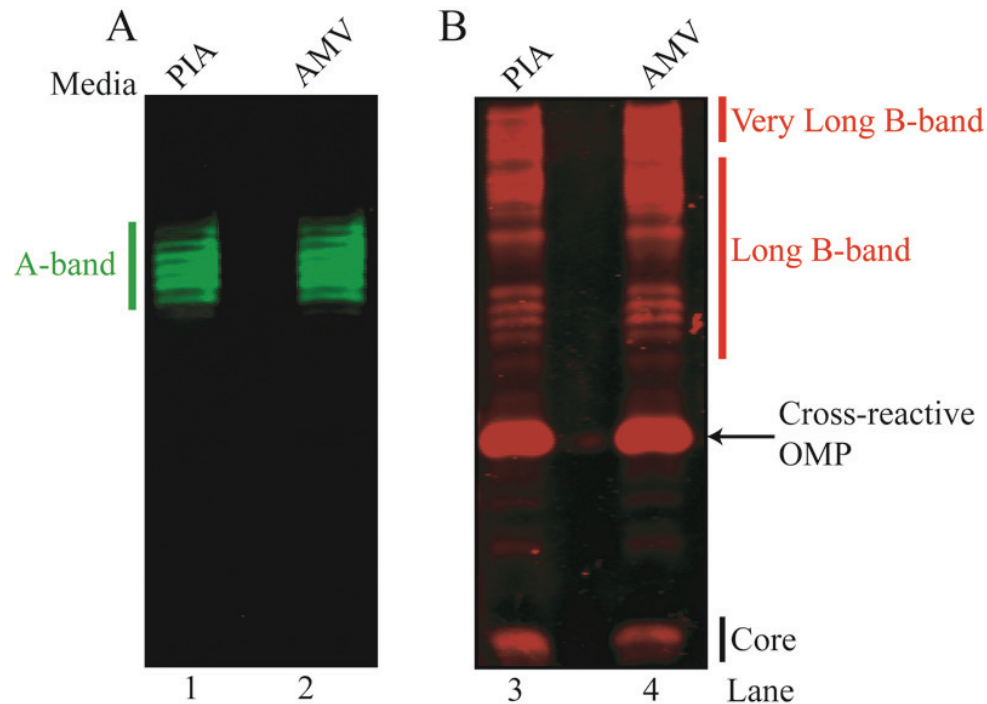

**Figure S3. Amount of A- or B-band O-antigen of LPS is not altered in PAO1 on PIA-AMV.** *P. aeruginosa* strain PAO1 was grown overnight at 37°C on either PIA or PIA-AMV. Bacteria from both of these plates were then transferred onto PIA or PIA-AMV and were grown overnight at 37°C. Cells were swabbed from these plates and suspended in 1 mL of Luria Broth to an OD<sub>600</sub> of 0.5. CFU counts were performed (data not shown), and equal amounts of colony forming units were used for preparation of LPS. LPS was prepared as described (Hitchcock & Brown, 1983). Briefly, the cells were then pelleted at 20,800 x g and supernatant was removed. The pellets were suspended in 200 uL of 1X sodium dodecyl sulfate (SDS) (0.1 M Tris-HCl pH 6.8, 2% β-mercaptoethanol, 2% SDS, 10% glycerol) and boiled for 15 minutes. After samples cooled, 200 uL of 2X SDS buffer were added to each sample, and 10 μl was electrophoresed on a 12% SDS-polyacrylamide gel and transferred to 0.45 μm nitrocellulose. The blots were then analyzed using

monoclonal A-band specific antibody N1F10 (Lam *et al.*, 1989) and polyclonal serogroup O5 antiserum (Accurate Chemical & Scientific) for B-band LPS. The secondary antibody of goat anti-rabbit immunoglobulin G coupled to IRDye 680 (Li-Cor Biosciences) or goat anti-mouse immunoglobulin M coupled to IRDye 800 using the IRDye 800CW Protein Labeling Kit – High MW, per manufacturer's instructions (Li-Cor Biosciences) was used for detection. Blots were then scanned using the Li-Cor Odyssey infrared imaging system and analyzed using Odyssey application software version 3.0.16 (Li-Cor Biosciences). Panel A indicates a representative of the A-band O-antigen LPS blots and Panel B indicates the B-band O-antigen LPS blots. Shown is a representative of three independent experiments.

**Profile of A- or B-band O-antigen of LPS is unaltered in induced mucoidy of PAO1.** During chronic infection of the CF airway, *P. aeruginosa* strains have altered LPS production. LPS is composed of lipid A, core polysaccharide and O-antigen polysaccharide. O-antigen is composed of the common antigen polysaccharide that is referred to as A-band and the serotype specific polysaccharide component known as B-band. Initial infecting strains are LPS-smooth and are able to synthesize complete LPS molecules with core, A- and B-band O-antigen. Isolates from the CF lung are commonly LPS-rough and do not make complete O-antigen molecules. These strains are serum sensitive and less virulent than LPS-smooth strains (Cryz *et al.*, 1984). Our data suggest that the PIA-AMV medium has little to no effect on O-antigen polysaccharide expression.

## REFERENCES FOR FIGURES S1, S2 AND S3

- Cryz, S. J., Jr., T. L. Pitt, E. Furer & R. Germanier, (1984) Role of lipopolysaccharide in virulence of *Pseudomonas aeruginosa*. *Infect Immun* **44**: 508-513.
- Hitchcock, P. J. & T. M. Brown, (1983) Morphological heterogeneity among *Salmonella* lipopolysaccharide chemotypes in silver-stained polyacrylamide gels. *J Bacteriol* **154**: 269-277.
- Lam, M. Y., E. J. McGroarty, A. M. Kropinski, L. A. MacDonald, S. S. Pedersen, N. Hoiby & J. S. Lam, (1989) Occurrence of a common lipopolysaccharide antigen in standard and clinical strains of *Pseudomonas aeruginosa*. *J Clin Microbiol* **27**: 962-967.
- Qiu, D., V. M. Eisinger, D. W. Rowen & H. D. Yu, (2007) Regulated proteolysis controls mucoid conversion in *Pseudomonas aeruginosa*. *Proc Natl Acad Sci U S A* **104**: 8107-8112.
- Wood, L. F., A. J. Leech & D. E. Ohman, (2006) Cell wall-inhibitory antibiotics activate the alginate biosynthesis operon in *Pseudomonas aeruginosa*: Roles of sigma (AlgT) and the AlgW and Prc proteases. *Mol Microbiol* **62**: 412-426.
- Wood, L. F. & D. E. Ohman, (2009) Use of cell wall stress to characterize sigma 22 (AlgT/U) activation by regulated proteolysis and its regulon in *Pseudomonas aeruginosa*. *Mol Microbiol* **72**: 183-201.
